# Supplementary material for: MITF variants cause nonsyndromic sensorineural hearing loss with autosomal recessive inheritance
Source: PubMed Central journal article supplement (PMC7391749; doi:10.1038/s41598-020-69633-4), 2020-07-29

## Supplementary Information

### ***MITF* variants cause nonsyndromic sensorineural hearing loss with autosomal recessive inheritance**

Supranee Thongpradit<sup>1,2</sup>, Natini Jinawath<sup>3,4</sup>, Asif Javed<sup>5,6</sup>, Saisuda Noojareern<sup>7</sup>, Arthaporn Khongkraparn<sup>7</sup>, Thipwimol Tim-aroon<sup>7</sup>, Krisna Lertsukprasert<sup>8</sup>, Bhoom Suktitipat<sup>4,9</sup>, Laran T Jensen<sup>10</sup>, Duangrurdee Wattanasirichaigoon<sup>7\*</sup>

<sup>1</sup> Program in Molecular Medicine, Faculty of Science, Mahidol University, Bangkok, Thailand

<sup>2</sup> Research Center, Faculty of Medicine Ramathibodi Hospital, Mahidol University, Bangkok, Thailand

<sup>3</sup> Program in Translational Medicine, Faculty of Medicine Ramathibodi Hospital, Mahidol University, Bangkok, Thailand

<sup>4</sup> Integrative Computational Bioscience Center, Mahidol University, Salaya, Nakhon Pathom, Thailand

<sup>5</sup> Computational and Systems Biology Group, Genome Institute of Singapore, Agency for Science, Technology and Research, Singapore

<sup>6</sup> School of Biomedical Sciences, University of Hong Kong, Hong Kong

<sup>7</sup> Division of Medical Genetics, Department of Pediatrics, Faculty of Medicine Ramathibodi Hospital, Mahidol University, Bangkok, Thailand

<sup>8</sup> Department of Communication Sciences and Disorders, Faculty of Medicine Ramathibodi Hospital, Mahidol University, Bangkok, Thailand

<sup>9</sup> Department of Biochemistry, Faculty of Medicine Siriraj Hospital, Mahidol University, Bangkok, Thailand

<sup>10</sup> Department of Biochemistry, Faculty of Science, Mahidol University, Bangkok, Thailand

\*Corresponding author

## Supplementary Methods

### Otogenome hearing loss gene panel analysis

DNA was isolated from leukocytes using the Purgene® DNA extraction kit. The integrity and purity of DNA was confirmed by gel electrophoresis. Concentrations were determined on a Qubit fluorometer using a dsDNA BR kit (Invitrogen, Q32850).

HL gene panel, OtoGenome™, (Laboratory for Molecular Medicine, Cambridge, MA, USA) consisted of 70 HL genes: *ACTG1*, *ATP6V1B1*, *BSND*, *CCDC50*, *CDH23*, *CLDN14*, *CLRN1*, *COCH*, *COL11A2*, *CRYM*, *DFNA5*, *DFNB31*, *DFNB59*, *DIAPH1*, *ESPN*, *ESRRB*, *EYA1*, *EYA4*, *GIPC3*, *GJB2*, *GJB3*, *GJB6*, *GPR98*, *GPSM2*, *GRHL2*, *GRXC1*, *HGF*, *ILDR1*, *KCNE1*, *KCNQ1*, *KCNQ4*, *LHFPL5*, *LOXHD1*, *LRTOMT*, *MARVELD2*, *MIR96*, *MIR183*, *MSRB3*, *MTRNR1* (12S rRNA), *MTTS1* [tRNA<sup>ser</sup> (UCN)], *MYH14*, *MYH9*, *MYO15A*, *MYO1A*, *MYO3A*, *MYO6*, *MYO7A*, *OTOA*, *OTOF*, *POU3F4*, *POU4F3*, *PRPS1*, *RDX*, *SERPINB6*, *SLC17A8*, *SLC26A4* (*PDS*), *STRC*, *TECTA*, *TIMM8A*, *TJP*, *TMC1*, *TMIE*, *TMPRSS3*, *TPRN*, *TRIOBP*, *USH1C*, *USH1G*, *USH2A*, and *WFS1*. DNA capture and amplification from genomic DNA was performed using oligonucleotide base target capture (Agilent SureSelect) followed by Illumina HiSeq sequencing of the coding regions and splice sites of the genes. Sanger sequencing was used to confirm all clinically significant variants and to fill in regions with insufficient coverage. Variants classified as likely benign or benign were not confirmed. Variant calls were generated using the Burrows-Wheeler Aligner followed by GATK analysis.

**144 nonsyndromic hearing loss genes analyzed** (<https://www.fulgentgenetics.com/Hearing-Loss-Nonsyndromic>, <https://hereditaryhearingloss.org>)

*ACTG1, ACTG10, ACTG11, ACTG12, ACTG13, ACTG14, ACTG15, ACTG16, ACTG17, ACTG18, ACTG19, ACTG2, ACTG20, ACTG21, ACTG22, ACTG23, ACTG24, ACTG25, ACTG3, ACTG4, ACTG5, ACTG6, ACTG7, ACTG8, ACTG9, ADCY1, AIFM1, BDP1, BSND, CABP2, CCDC50, CD164, CDC14A, CDH23, CEACAM16, CIB2, CLDN14, CLIC5, COCH, COL11A1, COL11A2, COL4A6, CRYM, DCDC2, DFNA5, DFNB59, DIAPH1, DMXL2, ELMOD3, EPS8, EPS8L2, ESPN, ESRP1, ESRRB, EYA4, FAM65B, FOXI1, GIPC3, GJB2, GJB3, GJB6, GPSM2, GRHL2, GRXCR1, GRXCR2, GSDME, HARS2, HGF, HOMER2, IFNLR1, ILDR1, KARS, KCNQ4, KITLG, LHFPL5, LMX1A, LOXHD1, LRTOMT, MARVELD2, MCM2, MET, MIR96, MIRN96, MITF, MPZL2, MSRB3, MYH14, MYH9, MYO15A, MYO1A, MYO3A, MYO6, MYO7A, NARS2, NLRP3, OSBPL2, OTOA, OTOF, OTOG, OTOGL, P2RX2, PCDH15, PDE1C, PDZD7, PJVK, PNPT1, POU3F4, POU4F3, PPIP5K2, PRPS1, PTPRQ, RDX, REST, RIPOR2, ROR1, S1PR2, SERPINB6, SIX1, SLC17A8, SLC22A4, SLC26A4, SLC26A5, SLITRK6, SMAC, SMPX, STRC, SYNE4, TBC1D24, TECTA, TJP2, TMC1, TMC2, TMEM132E, TMIE, TMPRSS3, TNC, TPRN, TRIOBP, TSPEAR, USH1C, USH2A, WBP2, WFS1, WHRN*

**Table S1** Variants of hearing loss genes identified in exome sequences of the affected and unaffected individuals from Family-1

| Gene          | RefSeq transcript ID | Inheritance | Coding            | Protein      | Affected |      |      | Unaffected | Allele feq            |            | SNPs ID      | ACMG <sup>b</sup>       | Classification         |
|---------------|----------------------|-------------|-------------------|--------------|----------|------|------|------------|-----------------------|------------|--------------|-------------------------|------------------------|
|               |                      |             |                   |              | IV-2     | IV-4 | IV-5 | IV-7       | In-house <sup>a</sup> | gnomAD     |              |                         |                        |
| <i>ELMOD3</i> | NM_001135023         | AR          | c.313A>G          | p.Ser105Gly  | Het      | WT   | Het  | Het        | 0.0658                | 0.011      | rs78809694   | BA1, BP1, BP4, BP6      | Benign                 |
| <i>ESRRB</i>  | NM_004452            | AR          | c.16A>G           | p.Arg6Gly    | WT       | WT   | WT   | Het        | 0.0416                | 0.00317    | rs143477571  | PP3, BS1, BS2, BP1, BP6 | Benign                 |
| <i>GJB2</i>   | NM_004004            | AD/AR       | c.109G>A          | p.Val37Ile   | Het      | WT   | Het  | WT         | 0.0827                | 0.00772    | rs72474224   | PS1, PS3, PM1           | Pathogenic             |
| <i>GRHL2</i>  | NM_024915            | AD          | c.1243G>A         | p.Val415Ile  | Het      | WT   | Het  | WT         | 0.0434                | 0.0135     | rs3779617    | PP3, BA1, BP1, BP6      | Benign                 |
| <i>MCM2</i>   | NM_004526            | AD          | c.1999G>A         | p.Val667Met  | Het      | WT   | Het  | WT         | 0.0439                | 0.00338    | rs2307311    | PP3, BS1, BS2, BP1, BP6 | Benign                 |
| <i>MITF</i>   | NM_198159.3          | AD          | c.1022G>A         | p.Arg341His  | Hom      | Hom  | Hom  | WT         | 0                     | 0.00000399 | rs1195515853 | PM1, PM2, PM5, PP3      | Likely-pathogenic      |
| <i>MYH9</i>   | NM_002473            | AD          | c.2635A>C         | p.Met879Leu  | Het      | Het  | Het  | WT         | 0.00288               | 0.000231   | rs200328859  | PP2, BS1, BS2, BP4, BP6 | Benign                 |
| <i>MYO7A</i>  | NM_001127179         | AD/AR       | c.4805G>A         | p.Arg1602Gln | Het      | WT   | Het  | Het        | 0.0271                | 0.00371    | rs139889944  | PM1, BS1, BS2           | Benign                 |
| <i>OTOA</i>   | NM_144672            | AR          | c.2359G>T         | p.Glu787*    | WT       | WT   | Het  | WT         | 0.182                 | 0.000308   | rs200988634  | PVS1, PP3               | Uncertain Significance |
| <i>OTOGL</i>  | NM_173591            | AR          | c.139C>T          | p.Gln47*     | WT       | WT   | Het  | Het        | 0                     | 0.0000101  | rs1193594940 | PVS1, PM2, PP3          | Pathogenic             |
| <i>PCDH15</i> | NM_033056            | AR          | c.2884C>T         | p.Arg962Cys  | WT       | Het  | Het  | WT         | 0.0271                | 0.000921   | rs201816080  | PM1, PM2, PP3, BP1      | Uncertain Significance |
| <i>REST</i>   | NM_001193508         | AD          | c.2241A>G         | p.Ile747Met  | WT       | Het  | Het  | WT         | 0                     | 0          | rs144031960  | PM2, BP1, BP4           | Likely-benign          |
| <i>TECTA</i>  | NM_005422            | AD/AR       | c.5372C>G         | p.Pro1791Arg | Het      | WT   | WT   | WT         | 0.00107               | 0.0000868  | rs754213928  | PM1, PM2, PP2, PP5      | Likely-pathogenic      |
| <i>TMC2</i>   | NM_080751            | AD          | c.2548_2550delAAG | p.lys850del  | Het      | Het  | Het  | Het        | 0.0507                | 0.0109     | rs142900000  | PM4, PP3, BA1           | Benign                 |
| <i>TRIOBP</i> | NM_001039141         | AR          | c.5764C>T         | p.Arg1922Trp | WT       | Het  | WT   | Het        | 0.0137                | 0.00118    | rs183941928  | PM2, PP3, BP1, BP6      | Likely-benign          |
|               |                      |             | c.163G>T          | p.Val55Leu   | WT       | Het  | WT   | WT         | 0.07                  | 0.0147     | rs77782321   | PM1, BA1, BP4, BP6      | Benign                 |

<sup>a</sup> in 200 individuals who did not have hearing loss as a major manifestation

<sup>b</sup> Richards, S. *et al.* Standards and guidelines for the interpretation of sequence variants: a joint consensus recommendation of the American College of Medical Genetics and Genomics and the Association for Molecular Pathology. *Genet Med.* **17**, 405-424 (2015).

**Table S2** Top 17 genes ranked by PhenGen analysis showing scores, gene location and corresponding disorders/major protein functions.

| Gene             | Probability<br>damaging score | Location          | Corresponding disorders<br>/protein functions                                                     |
|------------------|-------------------------------|-------------------|---------------------------------------------------------------------------------------------------|
| <i>MITF</i>      | 0.0885690996                  | 3p14.1            | WS2A, COMMAD, ADFNS                                                                               |
| <i>KCNJ12</i>    | 0.0055963440                  | 17p11.2           | Andersen cardiomyopathic periodic paralysis                                                       |
| <i>MUC6</i>      | 0.0025231421                  | 11p15.5           | major function in secreted mucins of the digestive tract                                          |
| <i>NAV3</i>      | 0.0011328982                  | 12q14.3-<br>q21.1 | involved in the process of neuron growth and regeneration                                         |
| <i>NDST3</i>     | 0.0010090281                  | 4q26              | catalyzing N-deacylation and sulfate transfer in N-acetyl glucosamine subunits of heparin sulfate |
| <i>APIS3</i>     | 0.0009123732                  | 2q36.1            | pustular psoriasis                                                                                |
| <i>KIAA0430</i>  | 0.0008699896                  | 16p13.13          | involved in ncRNA splicing                                                                        |
| <i>DNHD1</i>     | 0.0007344898                  | 11p15.4           | unknown                                                                                           |
| <i>RAD21-AS1</i> | 0.0006839718                  | -                 | ncRNA                                                                                             |
| uc003dws.3       | 0.0006839718                  | -                 | ncRNA                                                                                             |
| <i>OLFM1</i>     | 0.0005252689                  | 9q34.3            | regulating the production of neural crest by the neural tube                                      |
| NM_001100111     | 0.0002433756                  | -                 | ncRNA                                                                                             |
| <i>BAGE</i>      | 0.0001904779                  | 21p11.1           | unknown                                                                                           |
| <i>MUC20</i>     | 0.0000086459                  | 3q29              | regulate the Met signaling cascade through suppression of the Grb2-Ras pathway                    |
| <i>ZNF717</i>    | 0.0000042796                  | 3p12.3            | may function as a transcriptional factor                                                          |
| <i>NISCH</i>     | 0.0000023135                  | 3p21.1            | regulate cell migration by inhibiting p21-activated kinase (PAK1)                                 |
| <i>MADCAM1</i>   | 0.0000022778                  | 19p13.3           | membrane bound receptor regulating of leukocytes in mucosal tissues                               |

**Table S3** Primer sequences and PCR conditions for *MITF*-isoform A<sup>a</sup>

| Exon                   | Sequence (5'-3')        | Annealing temperature (°c) |
|------------------------|-------------------------|----------------------------|
| MITF-M 1F <sup>b</sup> | CAAACCTCGTAGGGCTTCCAA   | 60                         |
| MITF-M 1R <sup>b</sup> | TGAGCAATGAACAGGAGCTG    |                            |
| 1F                     | TGGGAGCTGTAGTTTTTCGTG   | 63                         |
| 1R                     | CTCTCCTCGCCCCAGAGT      |                            |
| 2F                     | TGGAGTACCATTCTGTGACTTGA | 60                         |
| 2R                     | ACACCTAGCAAATGGAAAATGG  |                            |
| 3F                     | TCATGTTTGTGCCTGAAGGA    | 60                         |
| 3R                     | CTTTTCCACCTCCCCTTCTC    |                            |
| 4F                     | CTGTGCCATCAGCTTTGTGT    | 60                         |
| 4R                     | TGCTTAAGTTTTTCAGGAAGGTG |                            |
| 5F                     | CCAATGCTTGGCAACTCATA    | 60                         |
| 5R                     | GAACCCTGGAAACACCTCAA    |                            |
| 6F                     | CAAAGGGAACTGGTTGAGGA    | 60                         |
| 6R                     | TGTTTTAACCACTGCAGAGACC  |                            |
| 7F                     | GCTTTTGAAAACATGCAAGC    | 60                         |
| 7R                     | CAGCTGTAGGAATCAACTCTCC  |                            |
| 8F                     | CGTTGTCATGACCTGGAGAA    | 60                         |
| 8R                     | CCTTTTGCACAATTCAATGC    |                            |
| 9F                     | GTACACGGCTTGGGTGGT      | 60                         |
| 9R                     | GTCAACTCCCCTATGGCTCA    |                            |
| 10pF                   | CTAATGACGCGCATCTACCA    | 60                         |
| 10pR                   | TCCTGGGCTATTGATAAAGCA   |                            |
| 10dF                   | AACTGCTTCCTTTCTTGATTCG  | 60                         |
| 10dR                   | CCCTTCAGTTTCGGTTGGTA    |                            |

<sup>a</sup> PCR condition for *MITF*-isoform A and exon 1 of *MITF*-isoform M: initial denaturation at 94°C 5 min; 35 cycles of denaturation at 94°C for 45 sec, annealing for 45 sec, extension at 72°C for 45 sec (but 2 min for exon 1 of *MITF*-isoform A); and final extension at 72°C for 7 min. <sup>b</sup> primers sequence for exon 1 of *MITF*-M isoform. Reference sequences for *MITF*-A: NT\_011520.11, NM\_006941.3, NP\_008872.1; for isoform M: *MITF* isoform-M: NT\_022495, NM\_000248, NP\_000239

**Table S4** Primer sequences and PCR conditions for *GJB2*

| Exon | Sequence (5'-3')        | Annealing temperature (°C) |
|------|-------------------------|----------------------------|
| 1F   | TCTTTTCCAGAGCAAACCGCC   | 60                         |
| 1R   | R1-TGAGCACGGGTTGCCTCATC |                            |

**Table S5** Primer sequences and PCR conditions for *TYR* mutation screening<sup>a</sup>

| Exon | primer name | primer sequence (5'-3') | Annealing temperature (°C) |
|------|-------------|-------------------------|----------------------------|
| 1    | 1-1F        | TGTGCTTTTCAGAGGATGAA    | 50                         |
|      | 1-1R        | CAAACCTGCAGTTTCCACAG    |                            |
|      | 1-2F        | TCTGTCCAATGCACCACTT     | 50                         |
|      | 1-2R        | GCTTCTGGATTTCTTGTTCC    |                            |
|      | 1-3F        | CCCATGTTTAACGACATCAA    | 50                         |
|      | 1-3R        | ATACCCTGCCTGAAGAAGTG    |                            |
| 2    | 2F          | CTCAGGAGAAGTCTAACAAC    | 50                         |
|      | 2R          | AACTCAGAAAATTCTGAATTC   |                            |
| 3    | 3F          | GCCATTTAATTCCACAAAT     | 50                         |
|      | 3R          | GGTGACAACCTGATCACAGA    |                            |
| 4    | 4F2         | ATTTTGCAGCATTCTGGAGG    | 55                         |
|      | 4R2         | TGCCATGTACAAAATGGCCT    |                            |
| 5    | 5F          | GAGGCTTTGGAGTATTAGGTG   | 50                         |
|      | 5R          | GTTCCCTCATTACCAAATAGCA  |                            |

<sup>a</sup> PCR 35 cycles; reference sequences of *TYR* Variant 1: NT\_008984, NM\_000372, NP\_000363; gDNA 118.21 Kb; mRNA 2384 bp; CDS 1590 bp



**Figure S1** IGV data revealing the depth coverage varying between 92 and 152 reads, suggesting no missed call of the *MITF* segment.

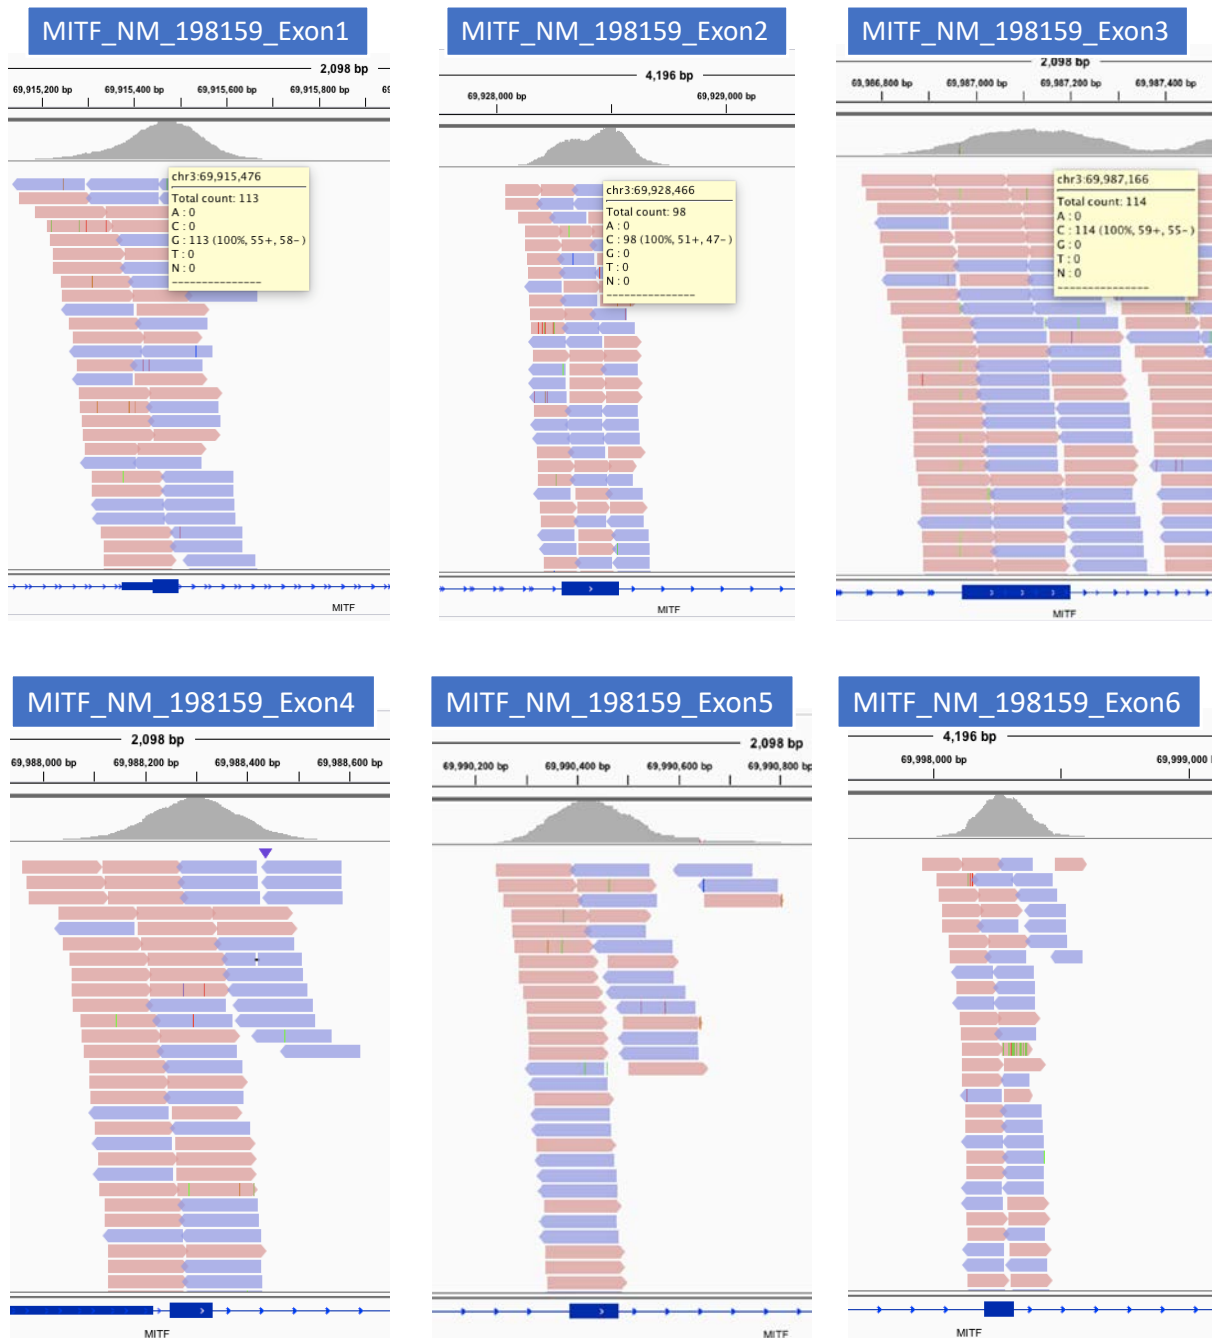

### MITF\_NM\_198159\_Exon7

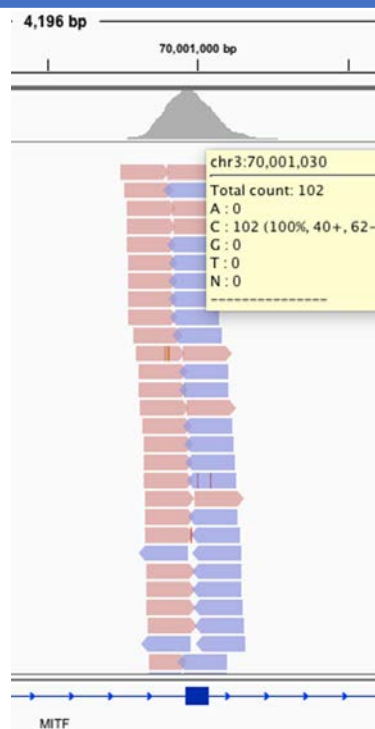

### MITF\_NM\_198159\_Exon8

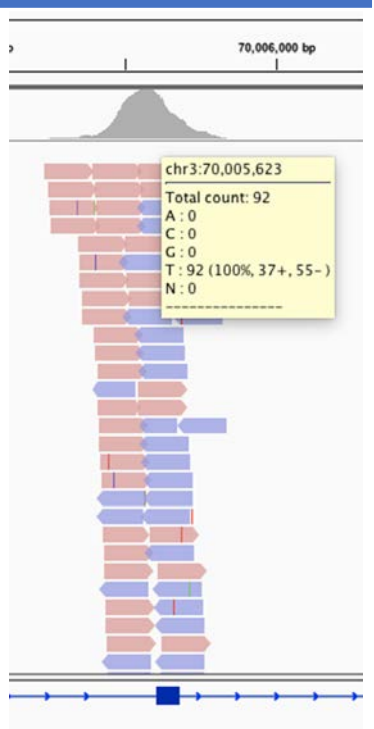

### MITF\_NM\_198159\_Exon9

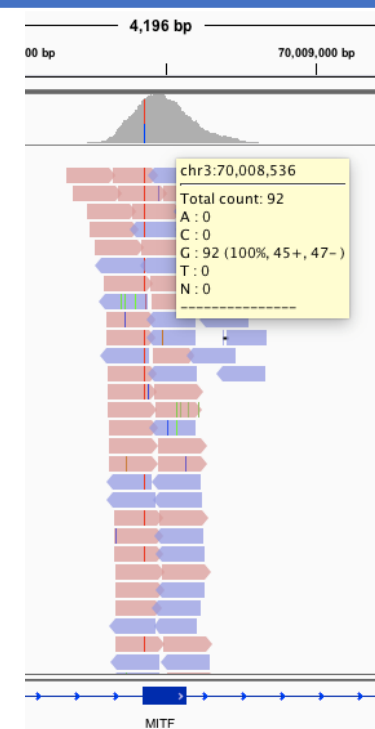

### MITF\_NM\_198159\_Exon10

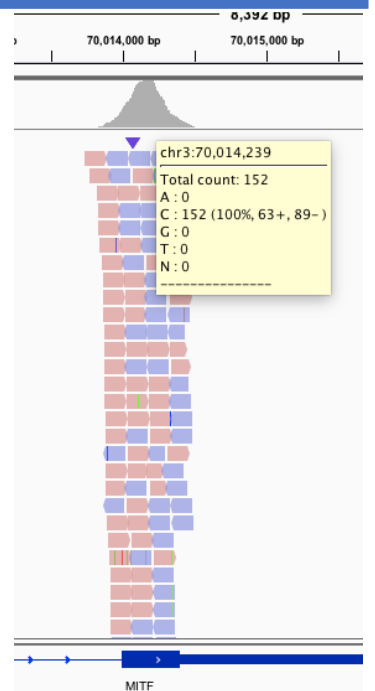

**Figure S2** Western blot of MITF wildtype and R341C and R341H. (a) A full-length gel showing, from left to right, molecular size marker; wildtype MITF-isoform A, R341C, R341H-1, and R341H-2 at around 105 kD; and wildtype MITF-isoform M (smaller size compared to MITF-isoform A). There was a significant increase of the R341C protein expressed, and a slightly decreased quantity of the R341H variant compared with wild-type MITF-A. The specimens of WT-A isoform, R341C, R341H-2 and MITF-M isoform were from transfection experiments performed on the same day, whereas that of R341H-1 was from an earlier experiment (one month apart). Our reason of having R341H-1 and R341H-2 on side-by-side was to confirm the decreased protein expression detected in our study. The 40<sup>+</sup> and 30<sup>+</sup> kD bands represented represented nonspecific background. (b) Lower part of the full-length gel [(of fig (a))] showing amount GAPDH used as a loading control for normalization for wildtype MITF and each variant. Noted almost equivalent amount of the GAPDH in all, but MITF-M, lanes. Details of preparation of this blot were as follow: the lower part of the full-length gel was cut out, followed by washing with PBST, three times; then incubated with GAPDH, washed with PBST before staining with secondary antibody; and washed again with PBST prior to visualization. Brightness and contrast of the images were not modified from its original appearances. Size marker used was PM2510, ExcelBand™, SMOBIO.

(a)

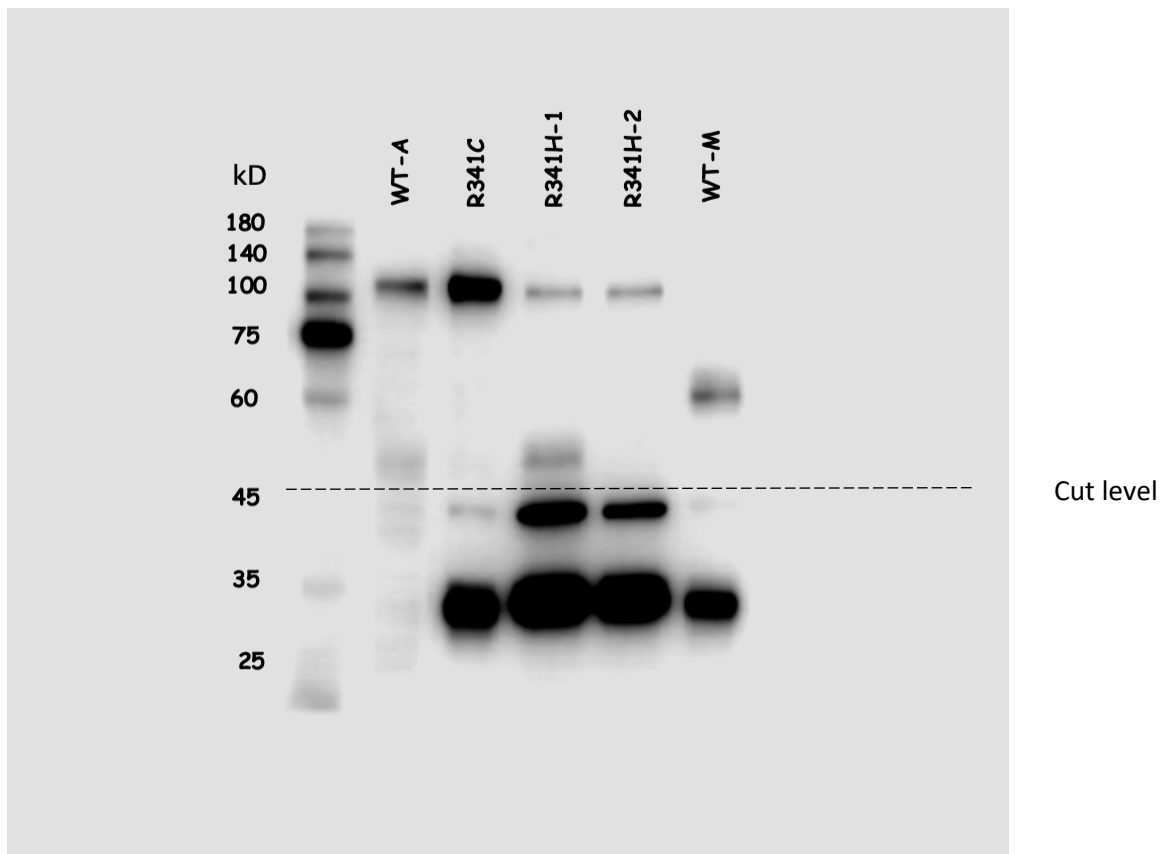

(b)

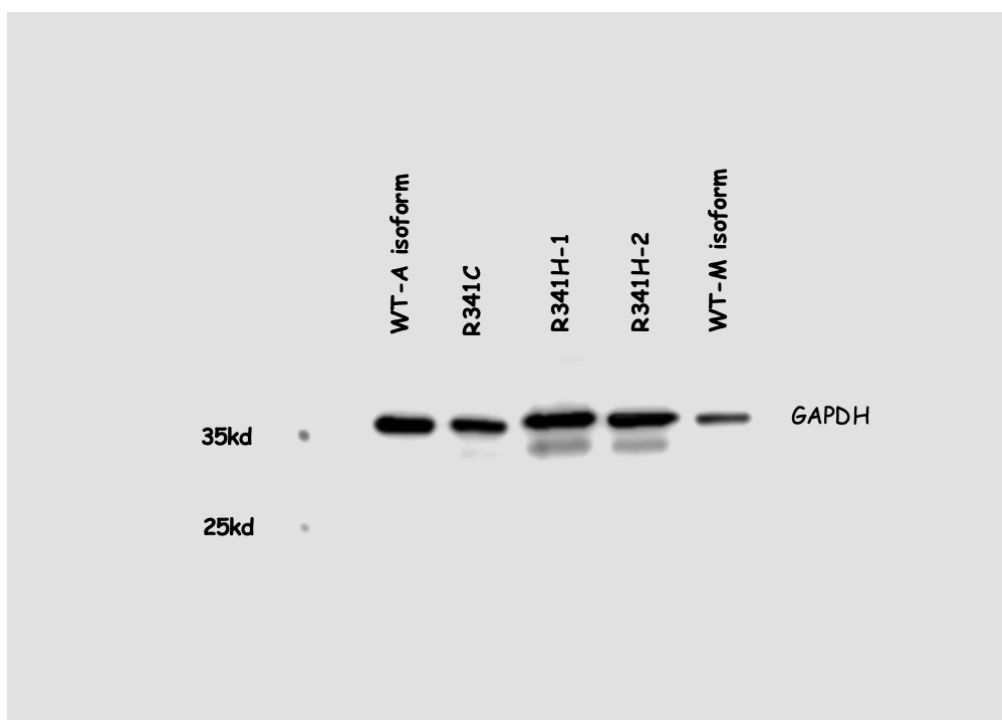

Supplement: 41598_2020_69633_MOESM1_ESM.pdf [file 41598_2020_69633_MOESM1_ESM.pdf]
